# Supplementary material for: Exposure to Zinc oxide nanoparticles during pregnancy induces oocyte DNA damage and affects ovarian reserve of mouse offspring
Source: publisher site journal article supplement (doi:10.18632/aging.101539), 2018-08-28
Supplement: Supplementary file [file aging-v10i8-101539-supplementary-material-SD1.pdf]

**SUPPLEMENTARY FIGURES**

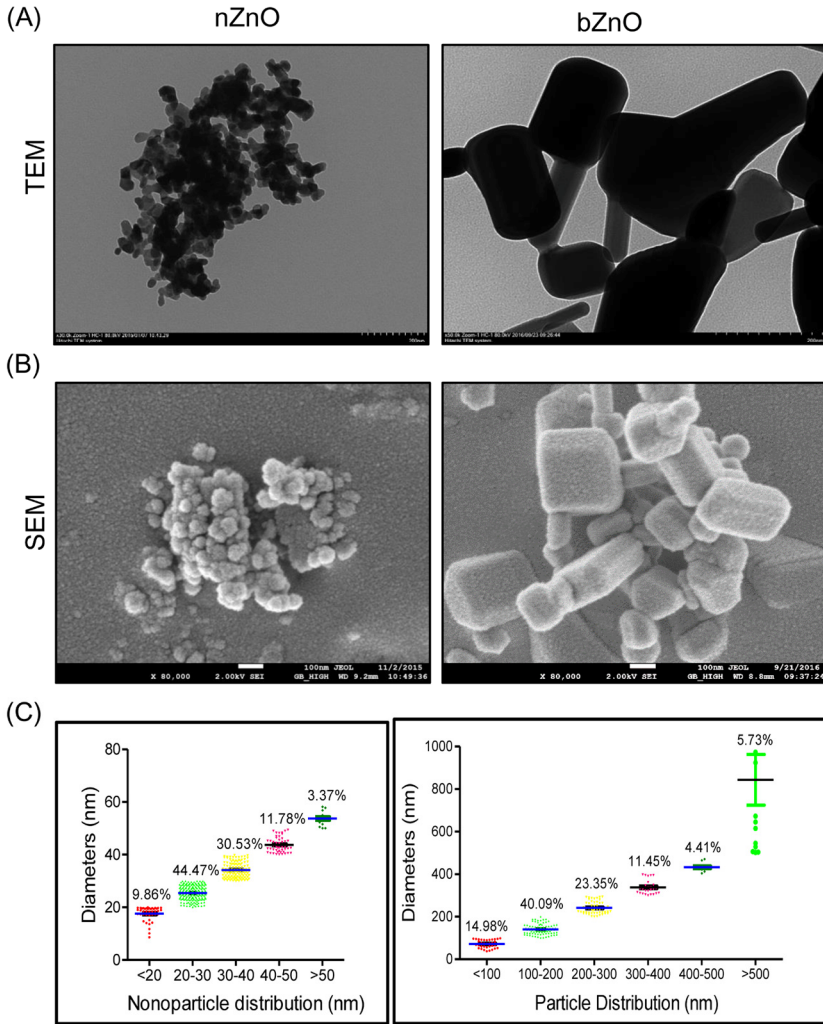

**Figure S1.** Characterization of nZnO and bZnO particles. (A) TEM analysis of nZnO and bZnO. (B) SEM analysis of nZnO and bZnO. (C) Size distribution of nZnO and bZnO.

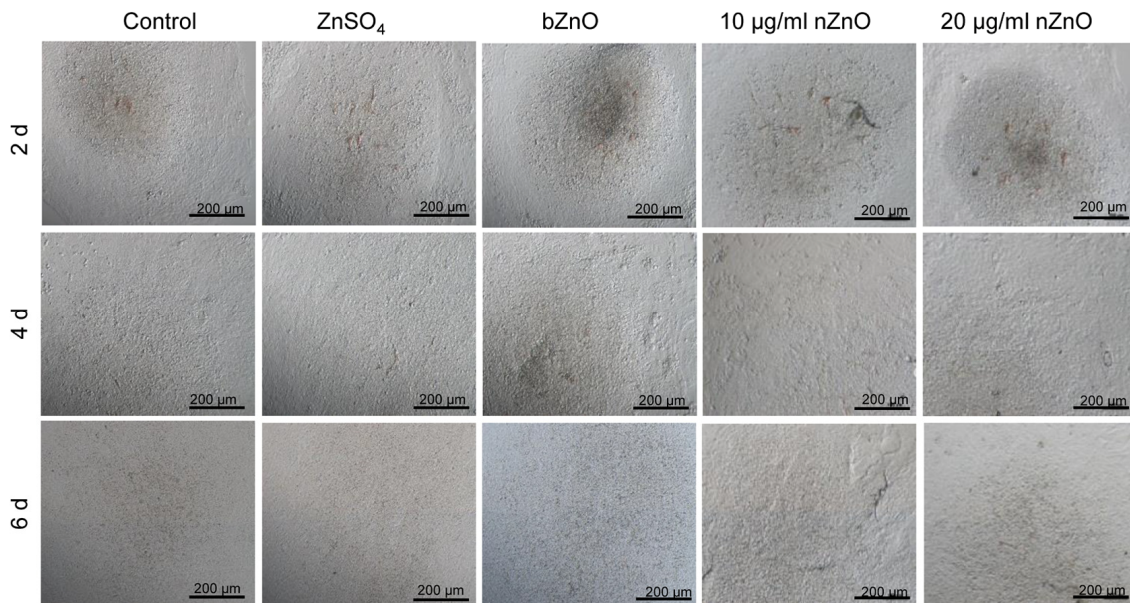

**Figure S2.** Morphology of control and ZnSO<sub>4</sub>, bZnO and nZnO exposed 12.5 dpc ovaries after 2, 4 and 6 days of culture.

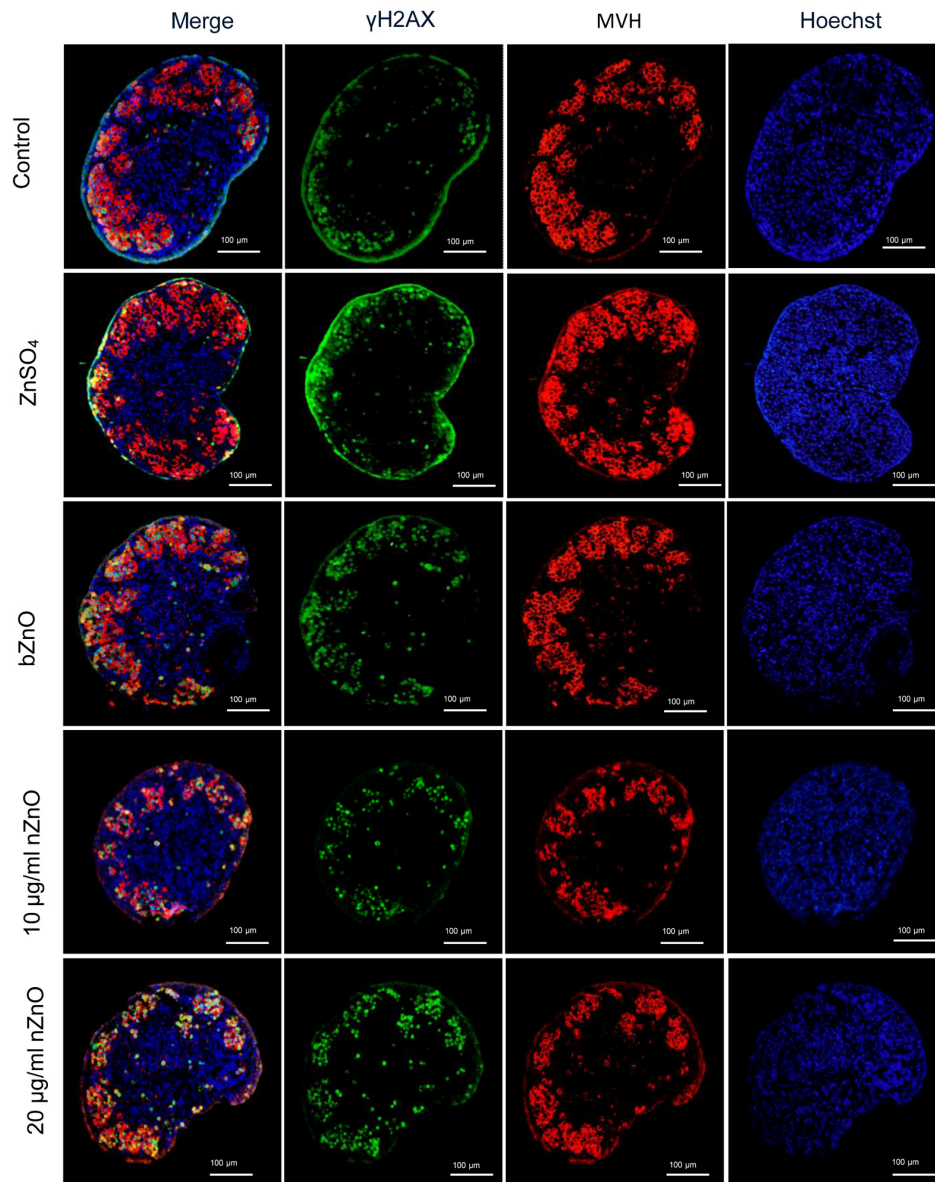

**Figure S3.** Ovaries cultured for 6 days stained for MVH (red) and  $\gamma$ H2AX (green).

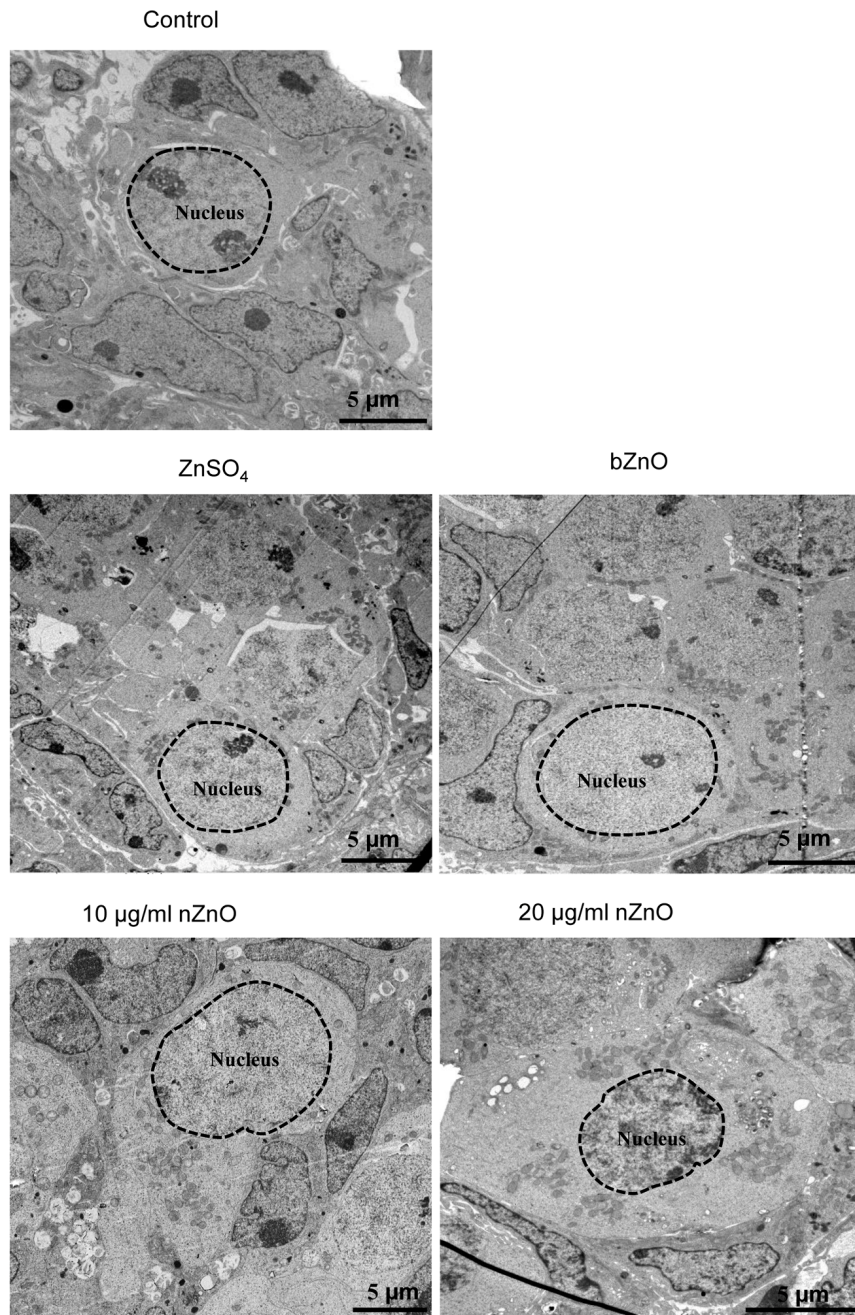

**Figure S4.** Ovary sections observed at TEM (dotted circle: nucleus).

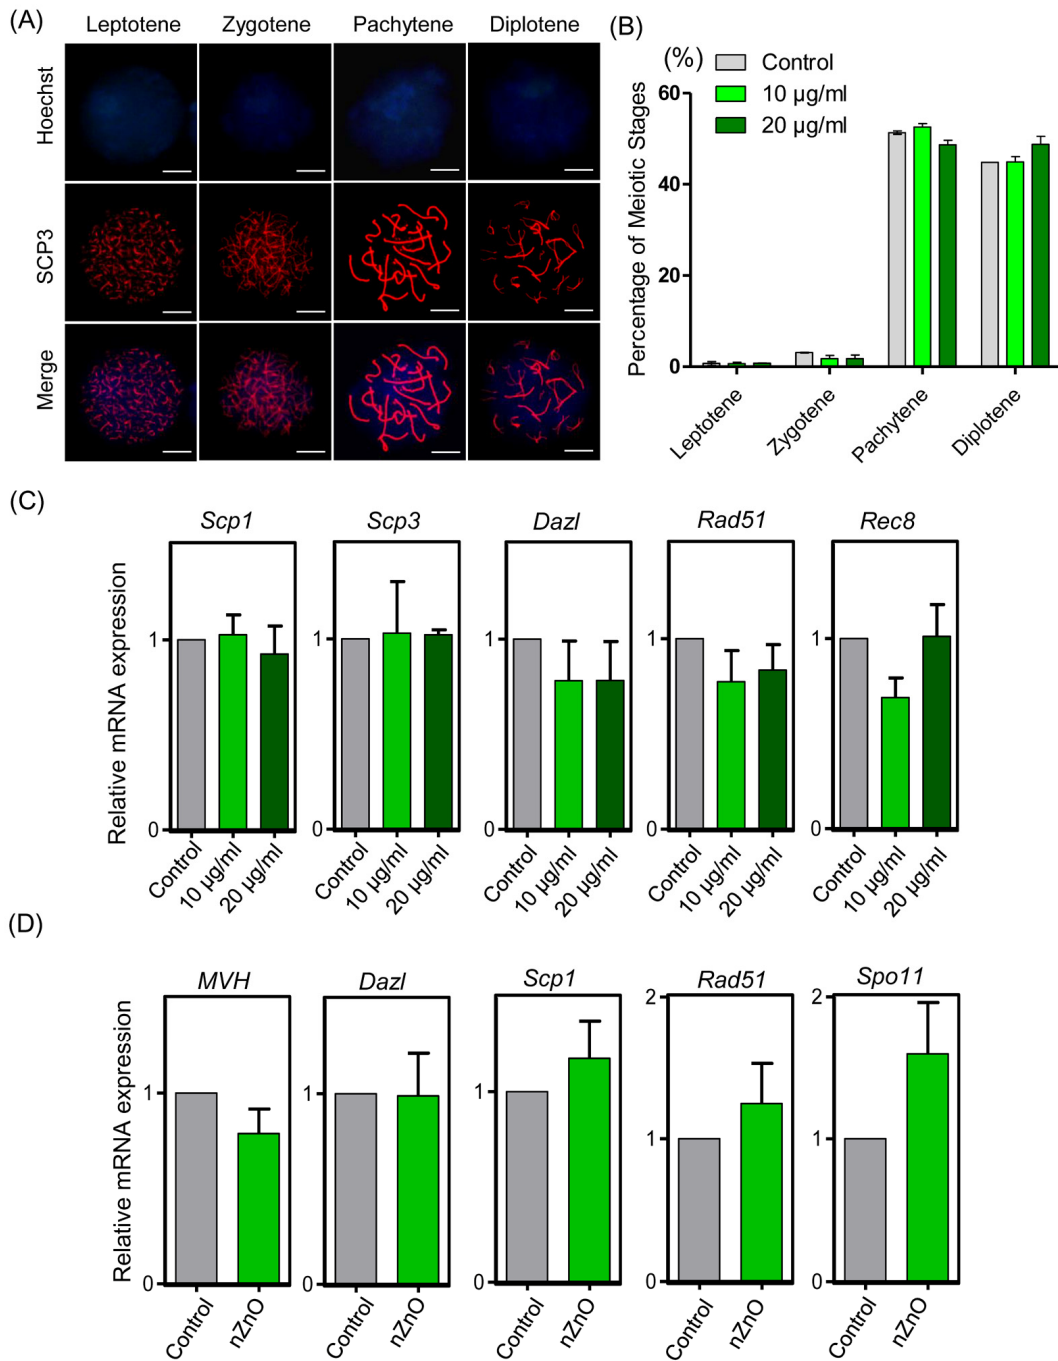

**Figure S5.** (A) Representative morphologies of leptotene, zygotene, pachytene, and diplotene oocytes. Chromosomes were stained with SCP3 (red) and DNA with Hoechst 33342 (blue). (B) Percentage of oocytes at different stages of meiosis obtained from ovaries cultured for 6 days as reported in the text. (C) Representative qRT-PCR of the indicated genes in ovarian tissues after 6 days of culture; *Actin* or *Mvh* was used as housekeeping gene. (D) qRT-PCR mRNA of genes encoding proteins typical of meiotic oocytes in 17.5 dpc fetal ovary. Expression was calculated relatively to the expression of *Actin* or *Mvh* as housekeeping gene in at least three independent experiments.

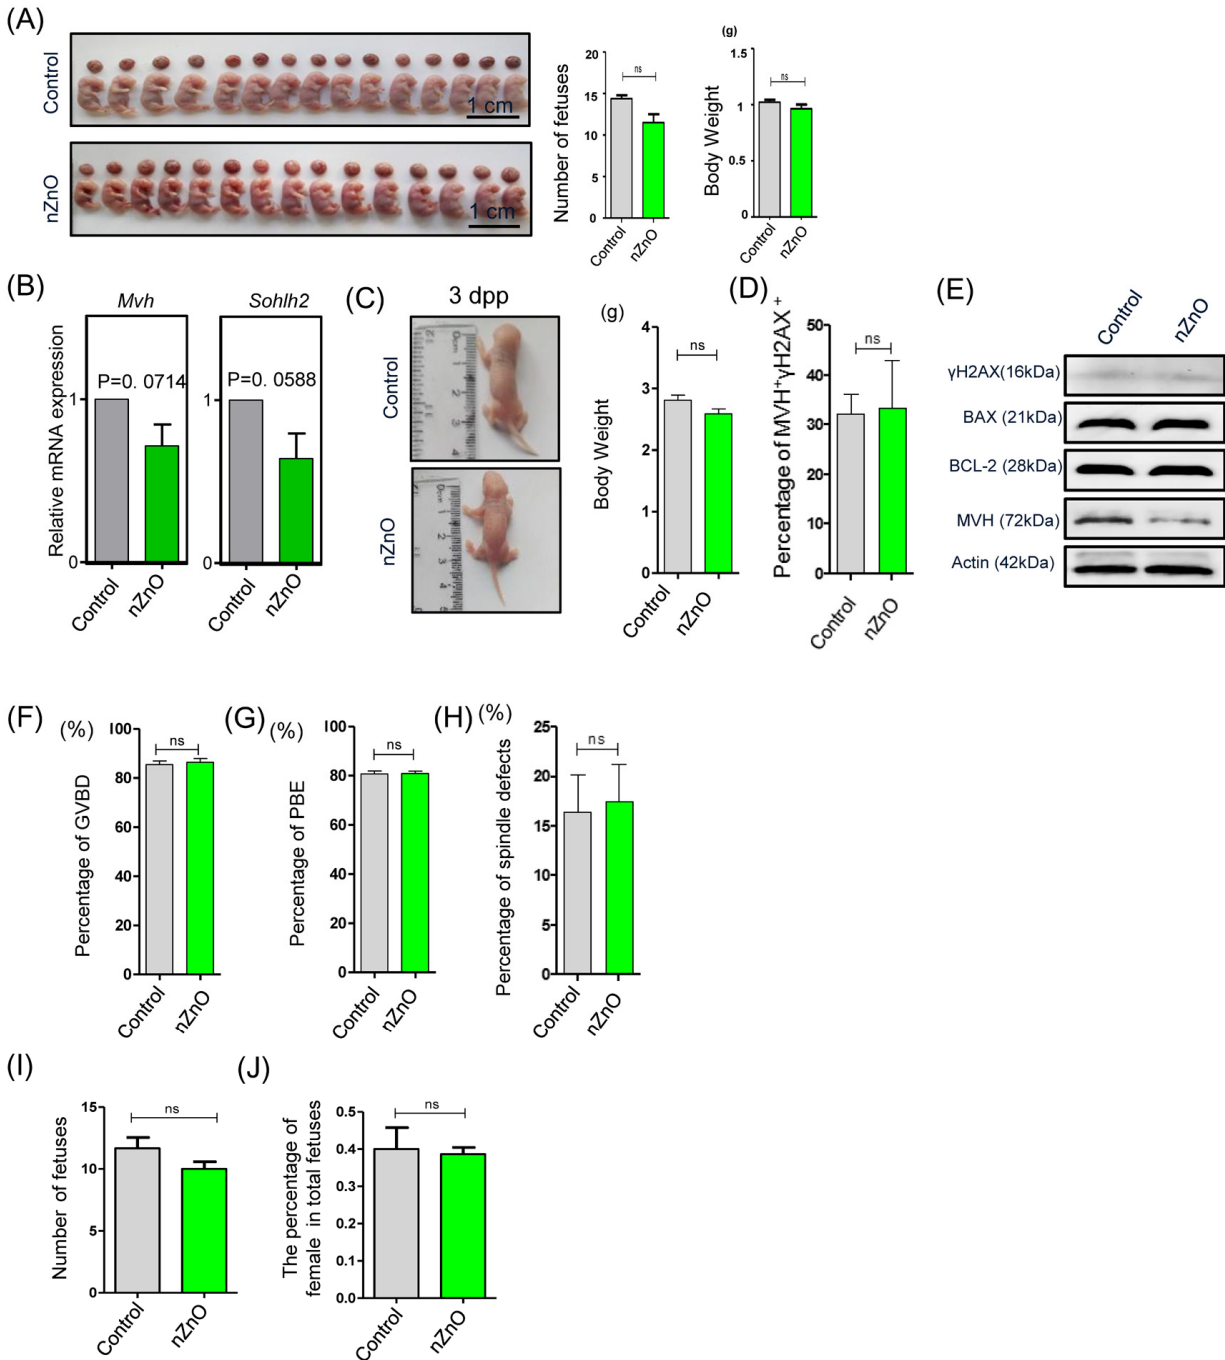

**Figure S5.** (A) Representative morphologies of leptotene, zygotene, pachytene, and diplotene oocytes. Chromosomes were stained with SCP3 (red) and DNA with Hoechst 33342 (blue). (B) Percentage of oocytes at different stages of meiosis obtained from ovaries cultured for 6 days as reported in the text. (C) Representative qRT-PCR of the indicated genes in ovarian tissues after 6 days of culture; *Actin* or *Mvh* was used as housekeeping gene. (D) qRT-PCR mRNA of genes encoding proteins typical of meiotic oocytes in 17.5 dpc fetal ovary. Expression was calculated relatively to the expression of *Actin* or *Mvh* as housekeeping gene in at least three independent experiments.
