# Supplementary material for: Exposure to Zinc oxide nanoparticles during pregnancy induces oocyte DNA damage and affects ovarian reserve of mouse offspring
Source: publisher site journal article supplement (doi:10.18632/aging.101539), 2018-08-28
Supplement: Supplementary file [file aging-v10i8-101539-supplementary-material-SD2.pdf]

## SUPPLEMENTARY TABLE

**Table S1. Primers for quantitative real-time PCR.**

| Genes          | Forward primer        | Reverse primer         | Genebank Accession number |
|----------------|-----------------------|------------------------|---------------------------|
| <i>β-actin</i> | TCGTGGGCCGCCCTAGGCAC  | TGGCCTTAGGGTTCAGGGGGG  | NM_007393.5               |
| <i>Mvh</i>     | TCAGACGCTCAACAGGATGT  | ACTGGATTGGGAGCTTGTGA   | NM_006517524.2            |
| <i>Scp1</i>    | GCGAAGATTGCTTTGGAGAC  | GCAGATGCCCGCAGATTAT    | NM_011516.2               |
| <i>Scp3</i>    | GGGGCCGGACTGTATTTACT  | AGGCTGATCAACCAAAGGTG   | NM_011517.2               |
| <i>Rad51</i>   | ACCAGACCCAGCTCCTTTAC  | CAAGTCGAAGCAGCATCCTC   | NM_011234.4               |
| <i>Spo11</i>   | TACTGCTGTGCCGACTAACA  | GTAGGGATCTGCATCGACCA   | NM_001305434.1            |
| <i>Rec8</i>    | TGATATGGAGGAGGCTGACC  | GCAGCCTCTAAAAGGTGTCG   | NM_020002.3               |
| <i>Dazl</i>    | ATCAGCAACCACAAGTCAAGG | GAGACAAATCCATAGCCCTTCG | NM_010021.5               |
| <i>Bax</i>     | ATGCGTCCAAGGAAGACTGAG | CCCAGTTGAAGTTGCCATCAG  | NM_007527                 |
| <i>Bcl-2</i>   | GCAGAGATGTCCAGTCAG    | CACCGAACTCAAAGAAGG     | NM_009741.5               |
| <i>Lhx8</i>    | CAGTTCGCTCAGGACAACAA  | CCTGCAGTTCTGAAACCACA   | NC_000069.5               |
| <i>Fig-α</i>   | ACAGAGCAGGAAGCCCAGTA  | TGGGTAGCATTTCCEAAGAG   | NM_012013.1               |
| <i>Sohlh2</i>  | TCTCAGCCACATCACAGAGG  | GGGGACGCGAGTCTTATACA   | NM_028937.3               |
